# Supplementary material for: CHICKN: extraction of peptide chromatographic elution profiles from large scale mass spectrometry data by means of Wasserstein compressive hierarchical cluster analysis
Source: Springer Nature journal article supplement (doi:10.1186/s12859-021-03969-0), 2021-02-12
Supplement: 12859_2021_3969_MOESM3_ESM.pdf [file 12859_2021_3969_MOESM3_ESM.pdf]

# Positive (semi-)definiteness of Wasserstein-1 based kernels for real-valued signals

Olga Permiakova, Romain Guibert, Alexandra Kraut,  
Thomas Fortin, Anne-Marie Hesse, Thomas Burger

September 17, 2020

Additional file to “*Extraction of peptide chromatographic elution profiles from large scale mass spectrometry data by means of Wasserstein compressive hierarchical cluster analysis*” by Olga Permiakova, Romain Guibert, Alexandra Kraut, Thomas Fortin, Anne-Marie Hesse, Thomas Burger.

## 1 Notations and definitions

**Definition 1** (Real-valued series). *This work focuses on real-valued signals, discretized on  $t$  time stamps, such as for instance  $x := [x^1, \dots, x^t]$  which can simply be referred to as vector  $x \in \mathbb{R}^t$ .*

**Definition 2** (Wasserstein-1 distance on real-valued series). *Let  $x, y \in \mathbb{R}^t$ . The W1 distance between  $x$  and  $y$  reads:*

$$d_{W1}(x, y) = \sum_{k=1}^t |F_x(k) - F_y(k)| = \|F_x - F_y\|_{\ell_1}$$

where  $F_x$  and  $F_y$  are the empirical cumulative functions of signals  $x$  and  $y$ , respectively:

$$F_x(k) = \sum_{i=1}^{k(k \leq t)} \frac{x^i}{\|x\|_{\ell_1}}$$

and

$$F_y(k) = \sum_{i=1}^{k(k \leq t)} \frac{y^i}{\|y\|_{\ell_1}}$$

**Definition 3** (Positive definite and positive semi-definite kernel). *A kernel  $k(\cdot, \cdot)$  is positive semi-definite (PSD) (respectively, positive definite (PD)) if and only if it is symmetric and for any choice of  $n$  distinct  $x_1, \dots, x_n \in \mathbb{R}^t$  (respectively,  $\in \mathbb{R}^t \setminus 0$ ) and of  $c_1, \dots, c_n \in \mathbb{R}$ :*

$$\sum_{i,j=1}^n c_i c_j k(x_i, x_j) \geq 0 \quad (\text{respectively, } > 0). \quad (1)$$

**Property 1.** A kernel  $k$  is PSD if and only if for any set of  $n$  distinct  $x_1, \dots, x_n \in \mathbb{R}^t$ , the kernel matrix  $K \in \mathbb{R}^{n \times n}$  defined by  $K_{ij} = k(x_i, x_j)$  has only non-negative eigenvalues.

*Proof.* [1] (Theorem 4.1.10 p.231) □

**Definition 4** (Gaussian W1 kernel).  $\forall x, y \in \mathbb{R}^t, \forall \gamma \in \mathbb{R}_+^*$ , the Gaussian W1 kernel reads:

$$k_{GW1}^\gamma(x, y) = e^{-\gamma \cdot d_{W1}(x, y)^2} \quad (2)$$

**Definition 5** (Laplacian W1 kernel).  $\forall x, y \in \mathbb{R}^t, \forall \gamma \in \mathbb{R}_+^*$ , the Laplacian W1 kernel reads:

$$k_{LW1}^\gamma(x, y) = e^{-\gamma \cdot d_{W1}(x, y)} \quad (3)$$

**Definition 6** (Exponential 1D kernel [2]).  $\forall x, y \in \mathbb{R}, \forall \gamma \in \mathbb{R}_+^*$ , the Exponential 1D kernel reads:

$$k_{E1D}^\gamma(x, y) = e^{-\gamma \cdot |x - y|} \quad (4)$$

**Property 2.**  $\forall x, y \in \mathbb{R}, \gamma \in \mathbb{R}_+^*$ , the Exponential 1D kernel  $k_{E1D}^\gamma(x, y)$  is positive definite.

*Proof.* [3] (Corollary 2.10. p. 78 and Theorem 2.2 p. 74) □

## 2 Gaussian W1 kernel

**Conjecture 1.**  $\forall x, y \in \mathbb{R}^t, \forall \gamma \in \mathbb{R}_+^*$  the kernel  $k_1^\gamma(x, y) = e^{-\gamma \cdot \|x - y\|_{\ell_1}^2}$  is positive definite.

If **Conjecture 1** holds, then, demonstrating the positive definiteness of  $k_{GW1}^\gamma$  is possible by following a line akin to the one used in the  $k_{LW1}^\gamma$  case (see Section 3).

Nevertheless, we provide here empirical supports for the PSD-ness of  $k_{GW1}^\gamma$  (which is sufficient to apply the kernel trick): For each dataset, we performed 5 Nyström approximations of the Gaussian W1 kernel matrix, as described in Algorithm 1 (main article) with different random subsampling, and we verified that all the eigenvalues were non-negative (leading to a PSD kernel, according to **Property 1**). The results are reported on Figures 1, 2 and 3, which display the 5 series of eigenvalues (for datasets Ecoli-DIA, Ecoli-FMS and UPS2GT, respectively), sorted by decreasing order, together with the largest ( $\lambda_{max}$ ) and smallest ( $\lambda_{min}$ ) eigenvalues across all the 5 tests. In addition, we observed that for raw data like Ecoli ones, for which CHICKN was designed, the  $\lambda_{min}$  is clearly positive (contrarily to datasets such as UPS2GT, which by construction may not lead to full rank data matrices). This makes us optimistic about **Conjecture 1**.

## 3 Laplacian W1 kernel

**Lemma 1.** Let  $(X_i)_{i=1}^m$  is a sequence of non empty sets,  $\forall i \in \{1, \dots, m\} x^i, y^i \in X_i$  and  $(k_i)_{i=1}^m$  is a sequence of positive definite kernels such that  $k_i : X_i \times X_i \rightarrow \mathbb{R}$ , then a kernel defined as:

$$K((x^1, \dots, x^m), (y^1, \dots, y^m)) = \prod_{i=1}^m k(x_i, y_i) \quad (5)$$

is positive definite on  $X_1 \times \dots \times X_m$ .

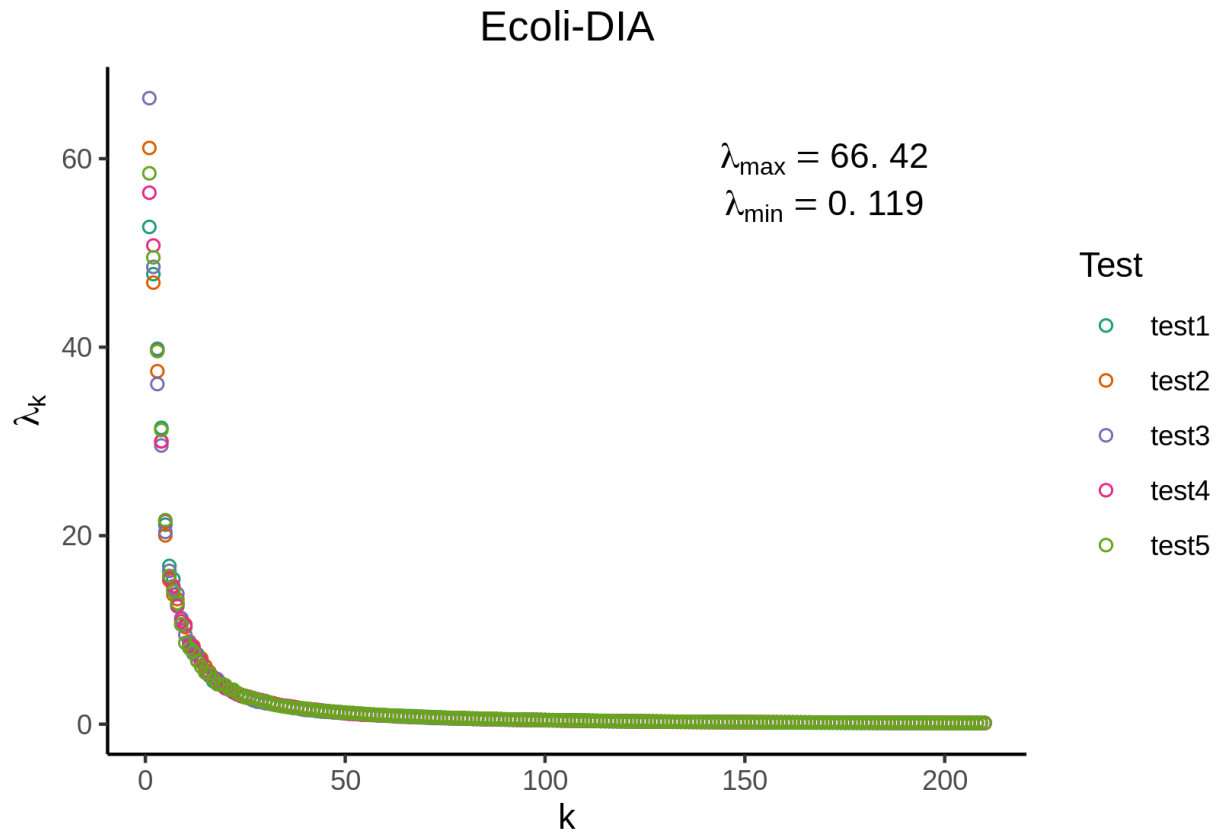

Figure 1: Matrix spectrum for the 5 repetitions (each with a specific color) of Nyström approximation resulting from Ecoli-DIA dataset. The minimal and maximum values ( $\lambda_{\min}$  and  $\lambda_{\max}$ , respectively) over these 5 tests are indicated in the upper right corner.

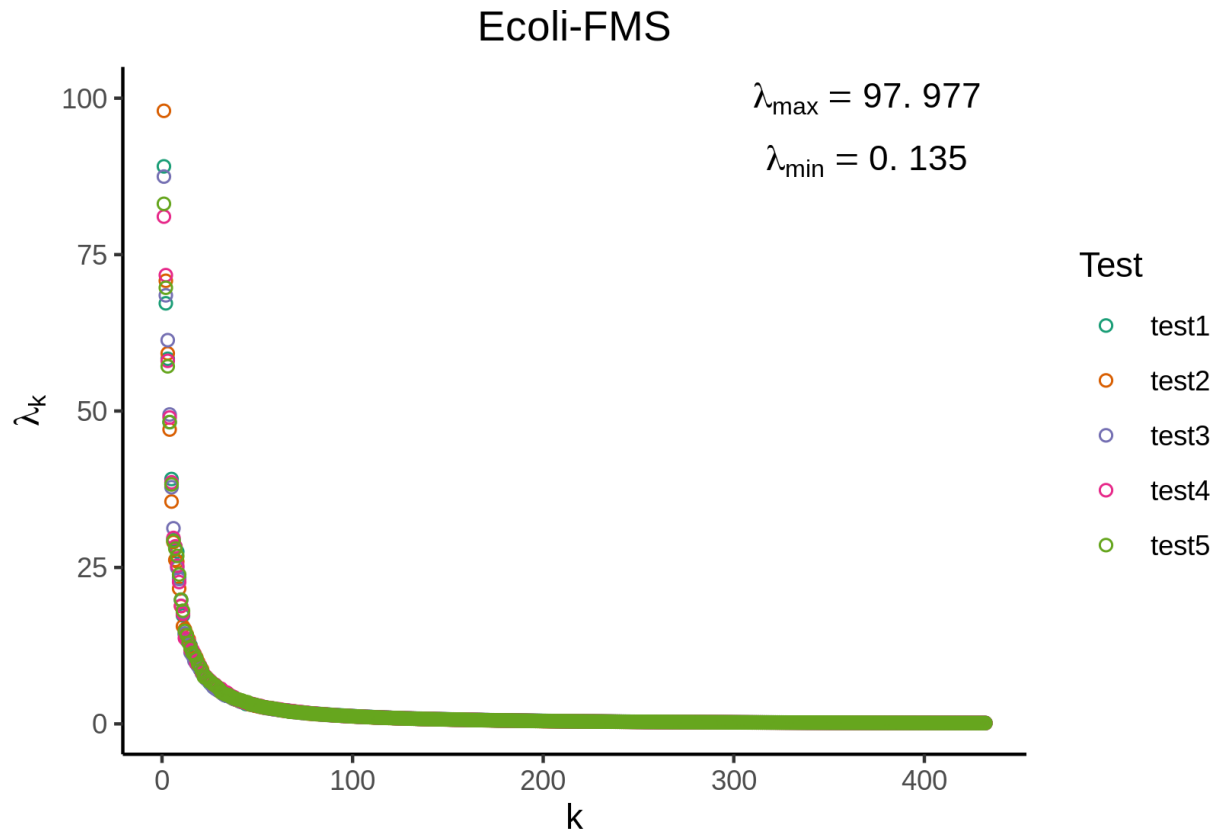

Figure 2: Matrix spectrum for the 5 repetitions (each with a specific color) of Nyström approximation resulting from Ecoli-FMS dataset. The minimal and maximum values ( $\lambda_{\min}$  and  $\lambda_{\max}$ , respectively) over these 5 tests are indicated in the upper right corner.

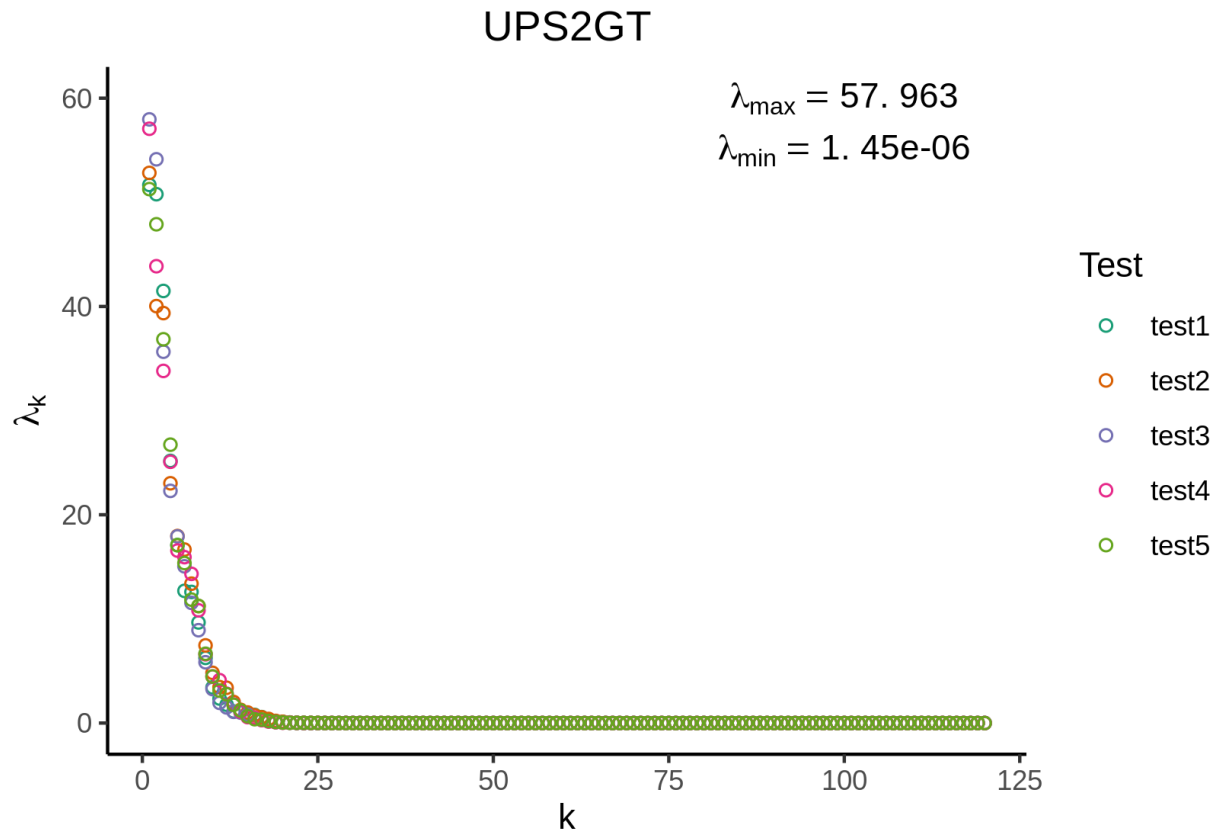

Figure 3: Matrix spectrum for the 5 repetitions (each with a specific color) of Nyström approximation resulting from UPS2GT dataset. The minimal and maximum values ( $\lambda_{\min}$  and  $\lambda_{\max}$ , respectively) over these 5 tests are indicated in the upper right corner.

*Proof.* [3] (Corollary 1.13 p. 70). □

**Lemma 2.**  $\forall x, y \in \mathbb{R}^t$  and  $\gamma \in \mathbb{R}_+^*$  the kernel  $k_2^\gamma(x, y) = e^{-\gamma \|x-y\|_{\ell_1}}$  is positive definite.

*Proof.* The  $\ell_1$  norm of a vector  $x$  reads

$$\|x\|_{\ell_1} = \sum_{i=1}^t |x^i|,$$

where  $x^i$  is  $i^{\text{th}}$  coordinate of  $x$ . The kernel  $k_2^\gamma(x, y)$  can be rewritten as follows:

$$k_2^\gamma(x, y) = \prod_{i=1}^t e^{-\gamma |x^i - y^i|}$$

where  $(e^{-\gamma |x^i - y^i|})_{i=1}^t$  is a sequence of Exponential 1D kernels, which are positive definite on  $\mathbb{R}$  (**Property 2**). Thus, according to **Lemma 1**,  $k_2^\gamma(x, y)$  is also positive definite. □

**Corollary 1.** *The Laplacian W1 kernel (see **Definition 5**) is positive definite.*

*Proof.* It is sufficient to notice that according the **Definition 2**, the Wasserstein-1 distance  $d_{W_1}(x, y)$  reads  $\|F_x - F_y\|_{\ell_1}$ , where  $F_x$  and  $F_y$  are the empirical cumulative functions, *i.e.* vectors  $\in \mathbb{R}^t$ . As the set of the empirical cumulative function  $X_F = \{F \in \mathbb{R}^t \mid F^1 \leq, \dots \leq F^t, \sum_{i=1}^t F^i = 1\}$  is a subset of  $\mathbb{R}^t$ , the positive definiteness of  $k_{LW_1}^\gamma$  derives directly from the positive definiteness of  $k_2^\gamma$  (**Lemma 2**). □

## References

- [1] Roger A Horn and Charles R Johnson. *Matrix analysis*. Cambridge university press, 2012.
- [2] Marc G Genton. Classes of kernels for machine learning: a statistics perspective. *Journal of machine learning research*, 2(Dec):299–312, 2001.
- [3] Christian Berg, Jens Peter Reus Christensen, and Paul Ressel. *Harmonic analysis on semigroups: theory of positive definite and related functions*, volume 100. Springer, 1984.
